# Supplementary material for: Searching for Genomic Region of High-Fat Diet-Induced Type 2 Diabetes in Mouse Chromosome 2 by Analysis of Congenic Strains
Source: PubMed Central journal article supplement (PMC4006839; doi:10.1371/journal.pone.0096271), 2014-05-01
Supplement: pone.0096271.s001.pdf [file pone.0096271.s001.pdf]

**Table S1. Allele variants on chromosome 2 (69.6-75.4 Mb) in A/J strain.**

| Chr  | Start    | Homo/Homo  | SNP | Ref | Allele1 | Allele2 | Ref Coverage | Mut Coverage | Total Coverage | Declebel Score | Effect         | Position | Gene Symbol   | strain |
|------|----------|------------|-----|-----|---------|---------|--------------|--------------|----------------|----------------|----------------|----------|---------------|--------|
| chr2 | 69540437 | Homozygous | SNP | T   | C       | C       | 1            | 13           | 14             | 477            | non_synonymous | I548V    | Fastkd1       | A      |
| chr2 | 69540459 | Homozygous | SNP | C   | A       | A       | 1            | 13           | 14             | 525            | synonymous     |          | Fastkd1       | A      |
| chr2 | 69540666 | Homozygous | SNP | T   | G       | G       | 0            | 23           | 23             | 884            | non_synonymous | Q471H    | Fastkd1       | A      |
| chr2 | 69540751 | Homozygous | SNP | T   | C       | C       | 0            | 28           | 28             | 1000           | non_synonymous | Y443C    | Fastkd1       | A      |
| chr2 | 69540933 | Homozygous | SNP | A   | G       | G       | 0            | 7            | 7              | 274            | splicing       | IVS-27   | Fastkd1       | A      |
| chr2 | 69545695 | Homozygous | SNP | A   | G       | G       | 0            | 11           | 11             | 440            | non_synonymous | I200T    | Fastkd1       | A      |
| chr2 | 69550470 | Homozygous | SNP | G   | C       | C       | 0            | 21           | 21             | 834            | non_synonymous | L17V     | Fastkd1       | A      |
| chr2 | 69574012 | Homozygous | SNP | G   | T       | T       | 0            | 12           | 12             | 479            | splicing       | IVS-34   | Ppig          | A      |
| chr2 | 69574160 | Homozygous | SNP | C   | T       | T       | 1            | 25           | 26             | 1000           | synonymous     |          | Ppig          | A      |
| chr2 | 69587341 | Homozygous | SNP | T   | G       | G       | 0            | 8            | 8              | 320            | non_synonymous | N387K    | Ppig          | A      |
| chr2 | 69619920 | Homozygous | SNP | C   | T       | T       | 0            | 24           | 24             | 943            | splicing       | IVS-31   | 4930578N16Rik | A      |
| chr2 | 69634296 | Homozygous | SNP | T   | C       | C       | 0            | 11           | 11             | 417            | 3'UTR          |          | Phospho2      | A      |
| chr2 | 69634901 | Homozygous | SNP | A   | T       | T       | 0            | 10           | 10             | 400            | 3'UTR          |          | Phospho2      | A      |
| chr2 | 69634952 | Homozygous | SNP | G   | T       | T       | 0            | 8            | 8              | 319            | 3'UTR          |          | Phospho2      | A      |
| chr2 | 69666882 | Homozygous | SNP | G   | A       | A       | 0            | 11           | 11             | 440            | splicing       | IVS-21   | Klh23         | A      |
| chr2 | 69718900 | Homozygous | SNP | G   | A       | A       | 0            | 19           | 19             | 724            | synonymous     |          | Mettl5        | A      |
| chr2 | 69719032 | Homozygous | SNP | C   | T       | T       | 0            | 11           | 11             | 437            | splicing       | IVS-27   | Mettl5        | A      |
| chr2 | 69719470 | Homozygous | SNP | T   | T       | A       | 6            | 16           | 22             | 311            | splicing       | IVS-2    | Mettl5        | A      |
| chr2 | 69821206 | Homozygous | SNP | A   | G       | G       | 0            | 25           | 25             | 961            | non_synonymous | N1269S   | Ubr3          | A      |
| chr2 | 69847147 | Homozygous | SNP | G   | A       | A       | 0            | 17           | 17             | 671            | splicing       | IVS-13   | Ubr3          | A      |
| chr2 | 70082861 | Homozygous | SNP | T   | C       | C       | 0            | 7            | 7              | 280            | splicing       | IVS-43   | Myo3b         | A      |
| chr2 | 70083412 | Homozygous | SNP | A   | T       | T       | 0            | 15           | 15             | 600            | non_synonymous | T596S    | Myo3b         | A      |
| chr2 | 70089898 | Homozygous | SNP | T   | C       | C       | 0            | 16           | 16             | 640            | synonymous     |          | Myo3b         | A      |
| chr2 | 70127606 | Homozygous | SNP | C   | A       | A       | 0            | 30           | 30             | 1000           | synonymous     |          | Myo3b         | A      |
| chr2 | 70188023 | Homozygous | SNP | T   | C       | C       | 1            | 8            | 9              | 307            | non_synonymous | L1227P   | Myo3b         | A      |
| chr2 | 70365511 | Homozygous | SNP | G   | A       | A       | 0            | 8            | 8              | 320            | synonymous     |          | 4933404M02Rik | A      |
| chr2 | 70805132 | Homozygous | SNP | A   | G       | G       | 0            | 11           | 11             | 410            | synonymous     |          | Mettl8        | A      |
| chr2 | 70805243 | Homozygous | SNP | A   | G       | G       | 0            | 10           | 10             | 395            | splicing       | IVS-30   | Mettl8        | A      |
| chr2 | 70810363 | Homozygous | SNP | T   | C       | C       | 0            | 10           | 10             | 400            | synonymous     |          | Mettl8        | A      |
| chr2 | 70810395 | Homozygous | SNP | G   | A       | A       | 1            | 10           | 11             | 387            | splicing       | IVS-5    | Mettl8        | A      |
| chr2 | 70819906 | Homozygous | SNP | C   | T       | T       | 1            | 48           | 49             | 1000           | splicing       | IVS+6    | Mettl8        | A      |
| chr2 | 70820007 | Homozygous | SNP | G   | A       | A       | 1            | 37           | 38             | 1000           | non_synonymous | R161W    | Mettl8        | A      |
| chr2 | 70820068 | Homozygous | SNP | T   | C       | C       | 0            | 30           | 30             | 1000           | non_synonymous | T140K    | Mettl8        | A      |
| chr2 | 70894511 | Homozygous | SNP | A   | G       | G       | 0            | 29           | 29             | 1000           | splicing       | IVS-41   | Dcaf17        | A      |
| chr2 | 70898383 | Homozygous | SNP | A   | C       | C       | 0            | 10           | 10             | 400            | splicing       | IVS-27   | Dcaf17        | A      |
| chr2 | 70916215 | Homozygous | SNP | C   | T       | T       | 0            | 16           | 16             | 640            | synonymous     |          | Dcaf17        | A      |
| chr2 | 70920020 | Homozygous | SNP | T   | C       | C       | 1            | 12           | 13             | 433            | synonymous     |          | Dcaf17        | A      |
| chr2 | 70920107 | Homozygous | SNP | T   | C       | C       | 0            | 19           | 19             | 732            | synonymous     |          | Dcaf17        | A      |
| chr2 | 70926376 | Homozygous | DEL | T   | -       | -       | 2            | 6            | 8              | 206            | splicing       | IVS-28   | Dcaf17        | A      |
| chr2 | 70926442 | Homozygous | SNP | A   | G       | G       | 0            | 13           | 13             | 475            | synonymous     |          | Dcaf17        | A      |
| chr2 | 70926547 | Homozygous | SNP | G   | A       | A       | 0            | 6            | 6              | 240            | synonymous     |          | Dcaf17        | A      |
| chr2 | 70967690 | Homozygous | SNP | T   | A       | A       | 0            | 15           | 15             | 600            | splicing       | IVS-20   | Cybrd1        | A      |
| chr2 | 70967780 | Homozygous | SNP | G   | A       | A       | 0            | 16           | 16             | 636            | synonymous     |          | Cybrd1        | A      |
| chr2 | 70967825 | Homozygous | SNP | T   | A       | A       | 0            | 18           | 18             | 701            | synonymous     |          | Cybrd1        | A      |
| chr2 | 70976404 | Homozygous | SNP | A   | G       | G       | 0            | 12           | 12             | 480            | non_synonymous | H188R    | Cybrd1        | A      |
| chr2 | 71087320 | Homozygous | SNP | A   | G       | G       | 0            | 16           | 16             | 639            | splicing       | IVS-46   | Dync1i2       | A      |
| chr2 | 71100873 | Homozygous | SNP | C   | T       | T       | 0            | 9            | 9              | 332            | 3'UTR          |          | Dync1i2       | A      |
| chr2 | 71113227 | Homozygous | SNP | T   | C       | C       | 0            | 9            | 9              | 352            | synonymous     |          | Slc25a12      | A      |
| chr2 | 71113347 | Homozygous | SNP | G   | A       | A       | 0            | 11           | 11             | 440            | synonymous     |          | Slc25a12      | A      |
| chr2 | 71114610 | Homozygous | SNP | T   | A       | A       | 0            | 41           | 41             | 1000           | splicing       | IVS-31   | Slc25a12      | A      |
| chr2 | 71120656 | Homozygous | SNP | C   | T       | T       | 1            | 23           | 24             | 843            | synonymous     |          | Slc25a12      | A      |
| chr2 | 71120674 | Homozygous | SNP | G   | A       | A       | 0            | 14           | 14             | 560            | splicing       | IVS-7    | Slc25a12      | A      |
| chr2 | 71146232 | Homozygous | SNP | A   | C       | C       | 1            | 9            | 10             | 355            | splicing       | IVS-35   | Slc25a12      | A      |
| chr2 | 71149570 | Homozygous | SNP | T   | A       | A       | 0            | 14           | 14             | 549            | synonymous     |          | Slc25a12      | A      |
| chr2 | 71153211 | Homozygous | SNP | G   | C       | C       | 0            | 17           | 17             | 566            | splicing       | IVS-25   | Slc25a12      | A      |
| chr2 | 71171784 | Homozygous | SNP | C   | T       | T       | 0            | 11           | 11             | 414            | splicing       | IVS-7    | Slc25a12      | A      |
| chr2 | 71248311 | Homozygous | SNP | T   | C       | C       | 0            | 15           | 15             | 600            | synonymous     |          | Hat1          | A      |
| chr2 | 71259301 | Homozygous | SNP | C   | T       | T       | 0            | 13           | 13             | 508            | synonymous     |          | Hat1          | A      |
| chr2 | 71276806 | Homozygous | SNP | C   | T       | T       | 1            | 16           | 17             | 600            | synonymous     |          | Hat1          | A      |
| chr2 | 71279333 | Homozygous | SNP | A   | C       | C       | 0            | 17           | 17             | 680            | synonymous     |          | Hat1          | A      |
| chr2 | 71279398 | Homozygous | SNP | T   | C       | C       | 0            | 14           | 14             | 556            | 3'UTR          |          | Hat1          | A      |
| chr2 | 71279409 | Homozygous | SNP | A   | G       | G       | 0            | 12           | 12             | 480            | 3'UTR          |          | Hat1          | A      |
| chr2 | 71349437 | Homozygous | SNP | G   | A       | A       | 0            | 21           | 21             | 832            | splicing       | IVS-32   | Metap1d       | A      |
| chr2 | 71349508 | Homozygous | SNP | T   | C       | C       | 0            | 12           | 12             | 476            | non_synonymous | W130R    | Metap1d       | A      |
| chr2 | 71363057 | Homozygous | SNP | A   | G       | G       | 0            | 16           | 16             | 638            | 3'UTR          |          | Metap1d       | A      |
| chr2 | 71368996 | Homozygous | SNP | C   | A       | A       | 0            | 39           | 39             | 1000           | splicing       | IVS-18   | Dlx1          | A      |
| chr2 | 71370506 | Homozygous | SNP | C   | T       | T       | 0            | 13           | 13             | 516            | synonymous     |          | Dlx1          | A      |
| chr2 | 71370518 | Homozygous | SNP | T   | C       | C       | 0            | 16           | 16             | 615            | synonymous     |          | Dlx1          | A      |
| chr2 | 71370560 | Homozygous | SNP | G   | A       | A       | 0            | 7            | 7              | 263            | synonymous     |          | Dlx1          | A      |
| chr2 | 71561377 | Homozygous | SNP | T   | C       | C       | 1            | 7            | 8              | 216            | non_synonymous | C33R     | Gm1631        | A      |
| chr2 | 71561398 | Homozygous | SNP | T   | C       | C       | 1            | 12           | 13             | 468            | non_synonymous | C40R     | Gm1631        | A      |
| chr2 | 71561509 | Homozygous | SNP | A   | G       | G       | 0            | 6            | 6              | 240            | non_synonymous | T77A     | Gm1631        | A      |
| chr2 | 71568787 | Homozygous | SNP | T   | G       | G       | 0            | 7            | 7              | 280            | 3'UTR          |          | Gm1631        | A      |
| chr2 | 71568889 | Homozygous | SNP | G   | C       | C       | 0            | 11           | 11             | 436            | 3'UTR          |          | Gm1631        | A      |
| chr2 | 71568960 | Homozygous | SNP | T   | C       | C       | 0            | 10           | 10             | 399            | 3'UTR          |          | Gm1631        | A      |
| chr2 | 71654777 | Homozygous | SNP | G   | A       | A       | 0            | 21           | 21             | 834            | synonymous     |          | Itga6         | A      |
| chr2 | 71663660 | Homozygous | SNP | T   | G       | G       | 0            | 13           | 13             | 520            | synonymous     |          | Itga6         | A      |
| chr2 | 71663687 | Homozygous | SNP | G   | A       | A       | 0            | 14           | 14             | 560            | synonymous     |          | Itga6         | A      |
| chr2 | 71664459 | Homozygous | SNP | T   | C       | C       | 0            | 15           | 15             | 600            | synonymous     |          | Itga6         | A      |
| chr2 | 71664732 | Homozygous | SNP | T   | A       | A       | 0            | 8            | 8              | 320            | splicing       | IVS-48   | Itga6         | A      |
| chr2 | 71672023 | Homozygous | SNP | C   | T       | T       | 0            | 10           | 10             | 397            | splicing       | IVS-43   | Itga6         | A      |
| chr2 | 71676285 | Homozygous | SNP | T   | C       | C       | 0            | 19           | 19             | 760            | splicing       | IVS-40   | Itga6         | A      |
| chr2 | 71676341 | Homozygous | SNP | C   | T       | T       | 0            | 18           | 18             | 716            | synonymous     |          | Itga6         | A      |
| chr2 | 71676365 | Homozygous | SNP | G   | A       | A       | 1            | 29           | 30             | 1000           | synonymous     |          | Itga6         | A      |
| chr2 | 71684107 | Homozygous | SNP | T   | G       | G       | 0            | 34           | 34             | 1000           | synonymous     |          | Itga6         | A      |
| chr2 | 71684254 | Homozygous | SNP | C   | G       | G       | 0            | 19           | 19             | 760            | non_synonymous | L975V    | Itga6         | A      |
| chr2 | 71713554 | Homozygous | SNP | C   | T       | T       | 0            | 12           | 12             | 470            | synonymous     |          | Pdk1          | A      |
| chr2 | 71713563 | Homozygous | SNP | C   | T       | T       | 0            | 6            | 6              | 233            | synonymous     |          | Pdk1          | A      |
| chr2 | 71738157 | Homozygous | SNP | C   | T       | T       | 0            | 22           | 22             | 880            | synonymous     |          | Pdk1          | A      |
| chr2 | 71738189 | Homozygous | SNP | T   | C       | C       | 0            | 10           | 10             | 400            | 3'UTR          |          | Pdk1          | A      |
| chr2 | 71869046 | Homozygous | SNP | T   | C       | C       | 0            | 8            | 8              | 320            | splicing       | IVS-44   | Rapgef4       | A      |
| chr2 | 71872125 | Homozygous | SNP | T   | A       | A       | 0            | 10           | 10             | 391            | synonymous     |          | Rapgef4       | A      |
| chr2 | 71892959 | Homozygous | SNP | G   | A       | A       | 0            | 12           | 12             | 472            | 5'UTR          |          | Rapgef4       | A      |
| chr2 | 72046127 | Homozygous | SNP | T   | A       | A       | 0            | 10           | 10             | 398            | splicing       | IVS-16   | Rapgef4       | A      |
| chr2 | 72046129 | Homozygous | SNP | T   | A       | A       | 0            | 11           | 11             | 437            | splicing       | IVS-14   | Rapgef4       | A      |
| chr2 | 72062997 | Homozygous | MNP | TG  | TG      | CT      | 9            | 10           | 19             | 283            | splicing       | IVS-21   | Rapgef4       | A      |
| chr2 | 72064517 | Homozygous | SNP | C   | A       | A       | 0            | 20           | 20             | 800            | splicing       | IVS-15   | Rapgef4       | A      |
| chr2 | 72072265 | Homozygous | SNP | A   | G       | G       | 0            | 26           | 26             | 1000           | splicing       | IVS+6    | Rapgef4       | A      |
| chr2 | 72079531 | Homozygous | SNP | G   | A       | A       | 0            | 11           | 11             | 439            | synonymous     |          | Rapgef4       | A      |
| chr2 | 74495818 | Homozygous | SNP | A   | C       | C       | 1            | 27           | 28             | 1000           | splicing       | IVS+6    | Evx2          | A      |
