# Supplementary material for: Searching for Genomic Region of High-Fat Diet-Induced Type 2 Diabetes in Mouse Chromosome 2 by Analysis of Congenic Strains
Source: PubMed Central journal article supplement (PMC4006839; doi:10.1371/journal.pone.0096271), 2014-05-01
Supplement: pone.0096271.s002.pdf [file pone.0096271.s002.pdf]

**Table S2.** Allele variants on chromosome 2 (69.6-75.4 Mb) in SM/J strain.

| Chr  | Start    | Homo/Homo  | SNP | Ref | Allele1 | Allele2 | Ref Coverage | Mut Coverage | Total Coverage | Declebel Score | Effect         | Position | Gene Symbol   | strain |
|------|----------|------------|-----|-----|---------|---------|--------------|--------------|----------------|----------------|----------------|----------|---------------|--------|
| chr2 | 69512514 | Homozygous | SNP | G   | T       | T       | 0            | 6            | 6              | 225.98691      | non_synonymous | A404S    | Ktbbd10       | SM     |
| chr2 | 69540437 | Homozygous | SNP | T   | C       | C       | 0            | 10           | 10             | 399.99567      | non_synonymous | I548V    | Fastkd1       | SM     |
| chr2 | 69540666 | Homozygous | SNP | T   | G       | G       | 1            | 18           | 19             | 696.84564      | non_synonymous | Q471H    | Fastkd1       | SM     |
| chr2 | 69540751 | Homozygous | SNP | T   | C       | C       | 0            | 24           | 24             | 959.98956      | non_synonymous | Y443C    | Fastkd1       | SM     |
| chr2 | 69540933 | Homozygous | SNP | A   | G       | G       | 0            | 13           | 13             | 492.97952      | splicing       | IVS-27   | Fastkd1       | SM     |
| chr2 | 69545695 | Homozygous | SNP | A   | G       | G       | 0            | 14           | 14             | 559.9939       | non_synonymous | I200T    | Fastkd1       | SM     |
| chr2 | 69550470 | Homozygous | SNP | G   | C       | C       | 0            | 12           | 12             | 479.99478      | non_synonymous | L17V     | Fastkd1       | SM     |
| chr2 | 69574012 | Homozygous | SNP | G   | T       | T       | 0            | 6            | 6              | 239.99739      | splicing       | IVS-34   | Ppig          | SM     |
| chr2 | 69619920 | Homozygous | SNP | C   | T       | T       | 0            | 22           | 22             | 859.98566      | splicing       | IVS-31   | 4930578N16Rik | SM     |
| chr2 | 69666882 | Homozygous | SNP | G   | A       | A       | 0            | 21           | 21             | 829.98694      | splicing       | IVS-21   | KIh123        | SM     |
| chr2 | 69719470 | Homozygous | SNP | T   | A       | A       | 1            | 10           | 11             | 308.51004      | splicing       | IVS-2    | Mettl5        | SM     |
| chr2 | 69821206 | Homozygous | SNP | A   | A       | G       | 5            | 13           | 18             | 439.48566      | non_synonymous | N1269S   | Ubr3          | SM     |
| chr2 | 69847147 | Homozygous | SNP | G   | A       | A       | 1            | 9            | 10             | 348.27914      | splicing       | IVS-13   | Ubr3          | SM     |
| chr2 | 70082861 | Homozygous | SNP | T   | C       | C       | 0            | 8            | 8              | 319.99652      | splicing       | IVS-43   | Myo3b         | SM     |
| chr2 | 70083412 | Homozygous | SNP | A   | T       | T       | 0            | 16           | 16             | 639.99304      | non_synonymous | T596S    | Myo3b         | SM     |
| chr2 | 70188023 | Homozygous | SNP | T   | C       | C       | 0            | 7            | 7              | 279.99695      | non_synonymous | L1227P   | Myo3b         | SM     |
| chr2 | 70347722 | Homozygous | SNP | G   | C       | C       | 0            | 6            | 6              | 239.99739      | non_synonymous | C158S    | 4933404M02Rik | SM     |
| chr2 | 70804501 | Homozygous | SNP | A   | G       | G       | 0            | 7            | 7              | 279.99695      | splicing       | IVS+4    | Mettl8        | SM     |
| chr2 | 70805243 | Homozygous | SNP | A   | G       | G       | 0            | 8            | 8              | 319.99652      | splicing       | IVS-30   | Mettl8        | SM     |
| chr2 | 70819906 | Homozygous | SNP | C   | T       | T       | 0            | 44           | 44             | 1000           | splicing       | IVS+6    | Mettl8        | SM     |
| chr2 | 70820007 | Homozygous | SNP | G   | A       | A       | 0            | 25           | 25             | 988.98413      | non_synonymous | R161W    | Mettl8        | SM     |
| chr2 | 70820068 | Homozygous | SNP | T   | C       | C       | 0            | 20           | 20             | 794.99036      | non_synonymous | T140K    | Mettl8        | SM     |
| chr2 | 70894511 | Homozygous | SNP | A   | G       | G       | 0            | 30           | 30             | 1000           | splicing       | IVS-41   | Dcaf17        | SM     |
| chr2 | 70898383 | Homozygous | SNP | A   | C       | C       | 0            | 8            | 8              | 306.98828      | splicing       | IVS-27   | Dcaf17        | SM     |
| chr2 | 70967690 | Homozygous | SNP | T   | A       | A       | 0            | 11           | 11             | 439.9952       | splicing       | IVS-20   | Cybrd1        | SM     |
| chr2 | 70976404 | Homozygous | SNP | A   | G       | G       | 0            | 10           | 10             | 388.99063      | non_synonymous | H188R    | Cybrd1        | SM     |
| chr2 | 71087320 | Homozygous | SNP | A   | G       | G       | 0            | 14           | 14             | 539.9897       | splicing       | IVS-46   | Dync1i2       | SM     |
| chr2 | 71114610 | Homozygous | SNP | T   | A       | A       | 0            | 24           | 24             | 936.90247      | splicing       | IVS-31   | Slc25a12      | SM     |
| chr2 | 71120674 | Homozygous | SNP | G   | A       | A       | 0            | 6            | 6              | 239.99739      | splicing       | IVS-7    | Slc25a12      | SM     |
| chr2 | 71146232 | Homozygous | SNP | A   | C       | C       | 0            | 8            | 8              | 317.99628      | splicing       | IVS-35   | Slc25a12      | SM     |
| chr2 | 71153211 | Homozygous | SNP | G   | C       | C       | 0            | 15           | 15             | 525.9321       | splicing       | IVS-25   | Slc25a12      | SM     |
| chr2 | 71171784 | Homozygous | SNP | C   | T       | T       | 1            | 16           | 17             | 645.8613       | splicing       | IVS-7    | Slc25a12      | SM     |
| chr2 | 71349437 | Homozygous | SNP | G   | A       | A       | 0            | 22           | 22             | 862.9855       | splicing       | IVS-32   | Metap1d       | SM     |
| chr2 | 71349508 | Homozygous | SNP | T   | C       | C       | 0            | 20           | 20             | 789.9874       | non_synonymous | W130R    | Metap1d       | SM     |
| chr2 | 71368996 | Homozygous | SNP | C   | A       | A       | 1            | 31           | 32             | 1000           | splicing       | IVS-18   | Dlx1          | SM     |
| chr2 | 72236298 | Homozygous | SNP | C   | A       | A       | 1            | 7            | 8              | 257.01877      | splicing       | IVS-49   | B230120H23Rik | SM     |
| chr2 | 72250081 | Homozygous | SNP | T   | C       | C       | 4            | 28           | 32             | 964.99054      | splicing       | IVS-47   | B230120H23Rik | SM     |
| chr2 | 72273267 | Homozygous | SNP | A   | G       | G       | 1            | 17           | 18             | 634.9924       | splicing       | IVS-21   | B230120H23Rik | SM     |
| chr2 | 72276260 | Homozygous | SNP | A   | G       | G       | 1            | 23           | 24             | 871.98816      | non_synonymous | N518S    | B230120H23Rik | SM     |
| chr2 | 72321393 | Homozygous | SNP | T   | C       | C       | 1            | 12           | 13             | 463.0823       | splicing       | IVS-19   | Cdca7         | SM     |
| chr2 | 73211964 | Homozygous | SNP | T   | C       | C       | 0            | 7            | 7              | 279.99695      | non_synonymous | I188V    | Gpr155        | SM     |
| chr2 | 73282659 | Homozygous | SNP | C   | G       | G       | 0            | 23           | 23             | 904.9767       | splicing       | IVS-28   | Wp1f1         | SM     |
| chr2 | 73452868 | Homozygous | SNP | T   | G       | G       | 0            | 12           | 12             | 463.9779       | splicing       | IVS-44   | Chn1          | SM     |
| chr2 | 73456141 | Homozygous | SNP | T   | C       | C       | 1            | 15           | 16             | 559.9939       | splicing       | IVS-26   | Chn1          | SM     |
| chr2 | 73462288 | Homozygous | SNP | C   | A       | A       | 0            | 9            | 9              | 345.99152      | splicing       | IVS-39   | Chn1          | SM     |
| chr2 | 74495818 | Homozygous | SNP | A   | C       | C       | 0            | 14           | 14             | 559.9939       | splicing       | IVS+6    | Evx2          | SM     |
| chr2 | 74714508 | Homozygous | SNP | T   | C       | C       | 0            | 10           | 10             | 399.99567      | non_synonymous | W257R    | Mtx2          | SM     |
